# Supplementary material for: Antibiotics Resistance and Adhesive Properties of Clinical Staphylococcus aureus Isolated from Wound Infections
Source: MDPI journal article supplement (doi:10.3390/microorganisms11051353), 2023-05-22
Supplement: s1 [file microorganisms-2393988-supplementary.pdf › microorganisms-2393988-supplementary.pdf]

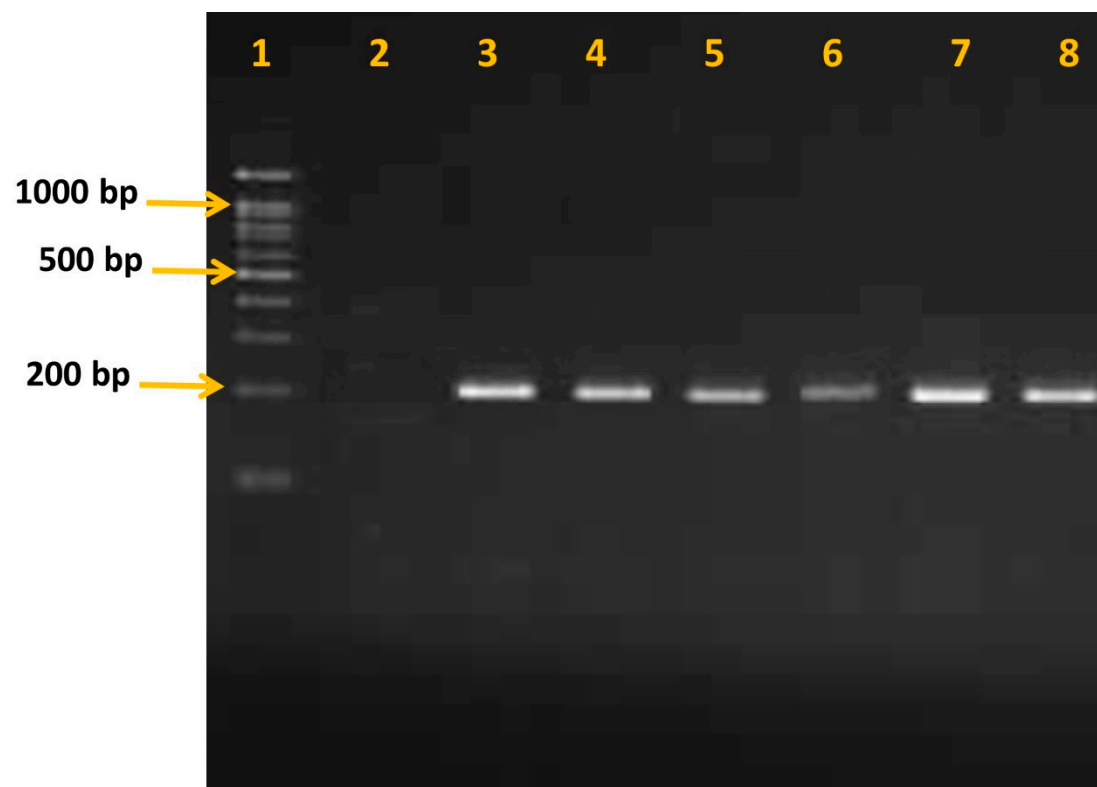

**Supplementary material Figure S1.** Agarose gel electrophoresis of PCR amplification of *icaA* (188 bp) and *icaD* (198 bp) locus. Lane 1: 100 pb DNA molecular size marker; Lanes 3-5: PCR amplification of *icaA*; Lanes 6-8: PCR amplification of *icaD*. Lane 2: Negative control; Lanes 3 to 8: PCR amplicons obtained with DNA of *S. aureus*. Lane 3: *S. aureus* ATCC 43300, Lane 4: S1; Lane 5: S3; Lane 6: S4; Lane 7: S8; Lane 8: S10.

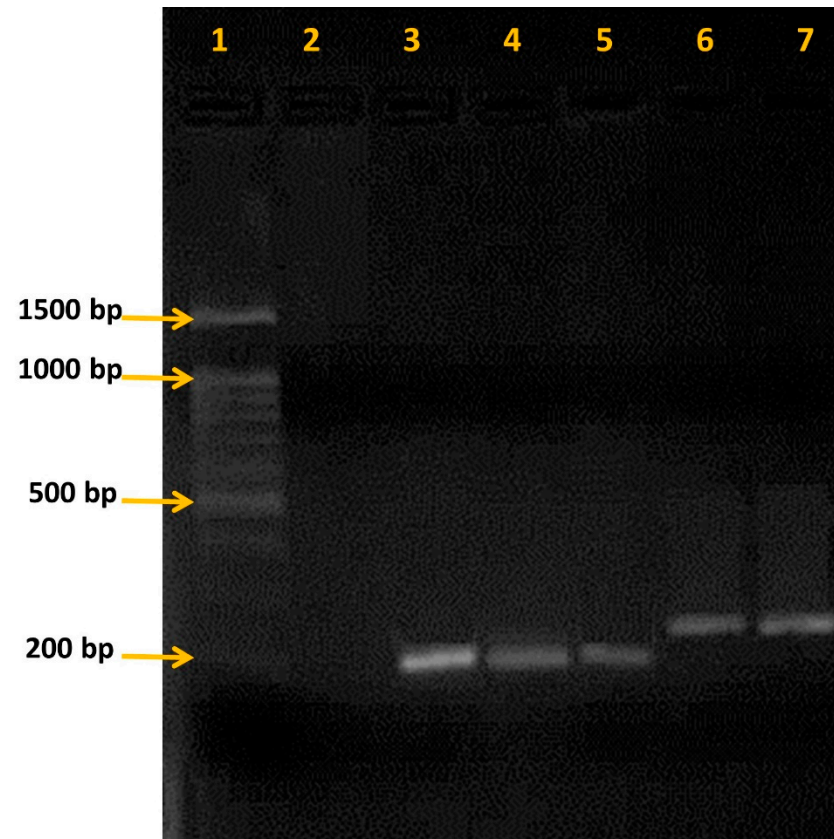

**Supplementary material Figure S2.** Agarose gel electrophoresis of PCR amplification of *fnbA* gene (191 bp) and *fnbB* gene (201 bp). Lane 1: 100 bp DNA molecular size marker; Lane 2: negative control; Lanes 3-5: PCR amplification of *fnbA* gene; Lanes 6-7: PCR amplification of *fnbB* gene; Lane 3 to 7: PCR amplicons obtained with DNA amplification of *S. aureus*; Lane 3: *S. aureus* ATCC 43300; Lane 4: S8; Lane 5: S13; Lane 6: *S. aureus* ATCC 43300; Lane 7: S20.

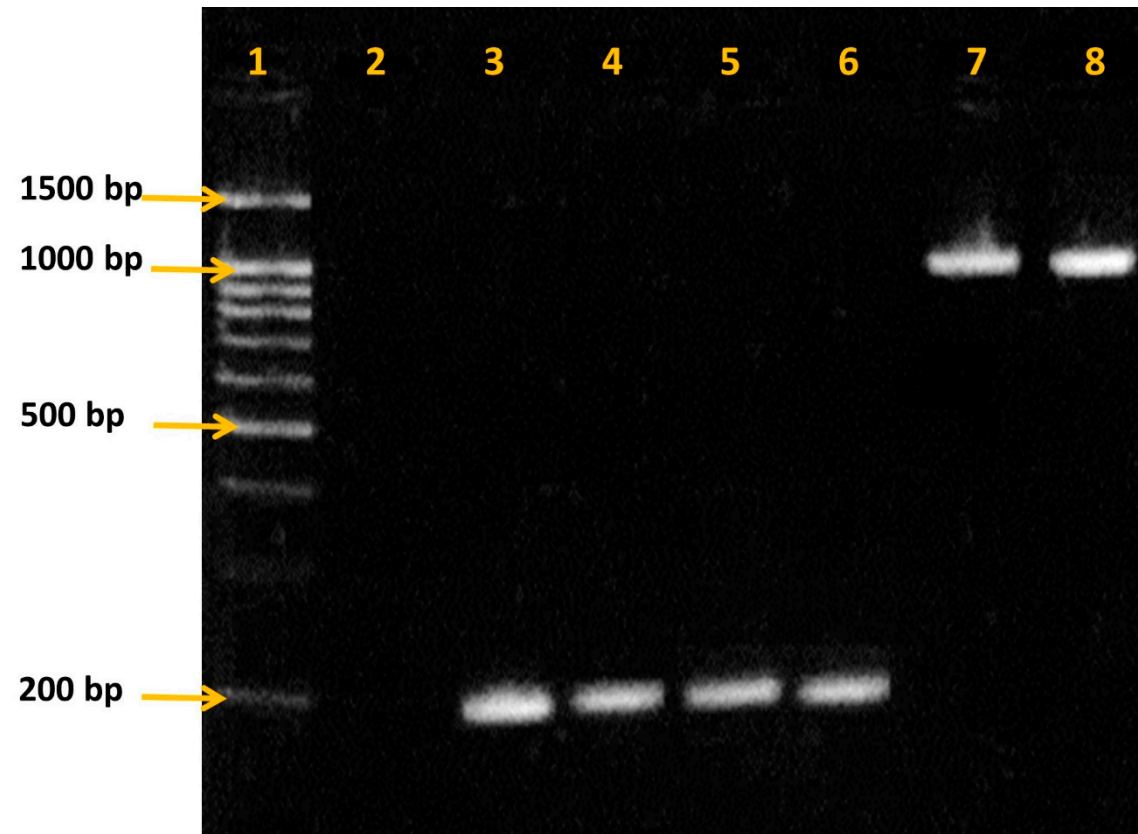

**Supplementary material Figure S3.** Agarose gel electrophoresis of polymerase chain reaction (PCR) amplification *cna* gene (192 bp) and *clfA* gene (1kb). Lane 1, 100 bp DNA molecular size marker. Lane 2 negative control; Lanes 3-6 PCR amplification of *cna* gene, lanes 7-8 PCR amplification of *clfA* gene. Lane 3 to 8 PCR amplicons obtained with DNA amplification of *S. aureus*. Lane 3, *S. aureus* ATCC 43300; Lane 4, S1; Lane 5, S6; Lane 6, S15; Lane 7, *S. aureus* ATCC 43300; Lane 8, S9.

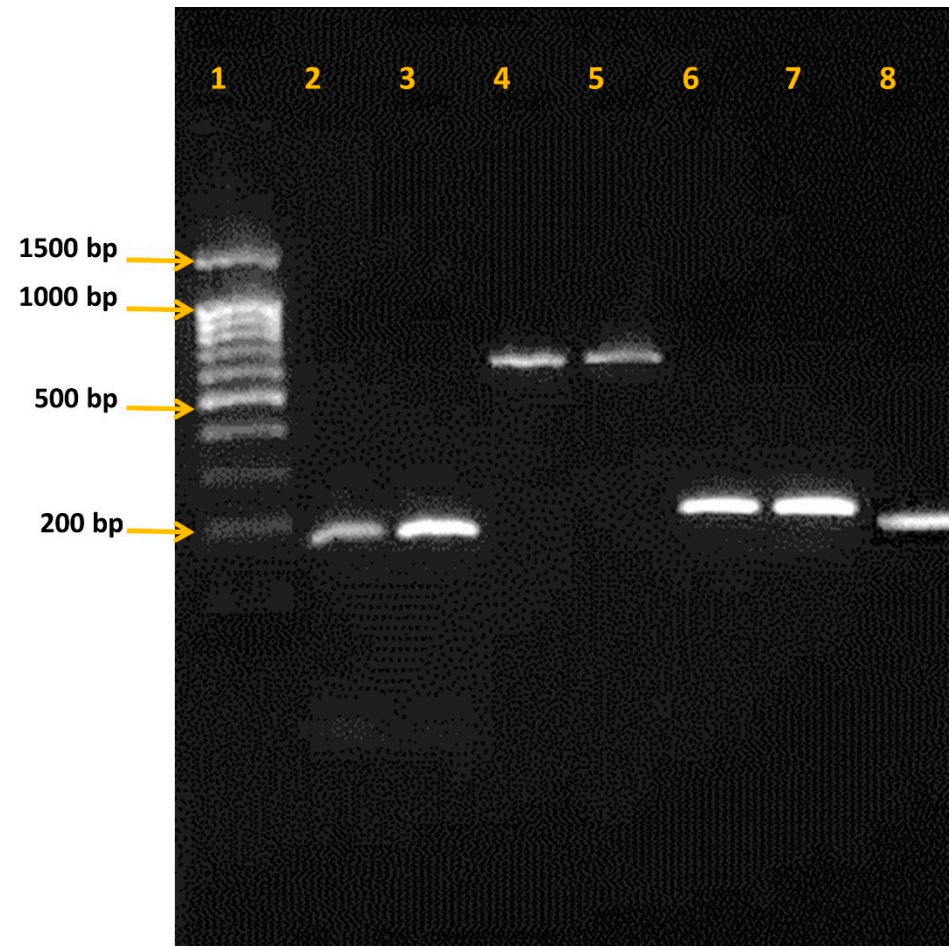

**Supplementary material Figure S4.** Agarose gel electrophoresis of polymerase chain reaction (PCR) amplification of *mecA* (140 pb), *norA* (620 bp), *NorB* (213 bp) and *blaZ* (172 bp) genes. Lane 1: 100 bp DNA molecular size marker; Lanes 2-3 PCR amplification of *mecA* gene. Lanes 4-5 PCR amplification of *norA* gene. Lanes 6-7 PCR amplification of *norB* gene and lane 8 PCR amplification of *blaZ* gene. Lanes 2: *S. aureus* ATCC 43300; Lanes 3 to 8 PCR amplicons obtained with DNA amplification of *S. aureus*. Lane 2: S1; Lane 3: S3; Lane 4: S8; Lane 5: S9; Lane 6: S6; Lane 7: S11; Lane 8: S23.

**Supplementary material Table S1.** Study of antimicrobial susceptibility profile of clinical *S. aureus* strains

| Antibiotics          | <i>Staphylococcus aureus</i> strains |      |      |      |      |      |      |      |      |      |      |      |      |      |      |      |       |      |      |     |       |      |      |      |
|----------------------|--------------------------------------|------|------|------|------|------|------|------|------|------|------|------|------|------|------|------|-------|------|------|-----|-------|------|------|------|
|                      | S1                                   |      | S2   |      | S3   |      | S4   |      | S5   |      | S6   |      | S7   |      | S8   |      | S9    |      | S10  |     | S11   |      | S12  |      |
|                      | MIC                                  | I    | MIC  | I    | MIC  | I    | MIC  | I    | MIC  | I    | MIC  | I    | MIC  | I    | MIC  | I    | MIC   | I    | MIC  | I   | MIC   | I    | MIC  | I    |
| Gentamicin           | <2                                   | S    | >8   | R    | <2   | S    | 2    | S    | 2    | S    | 2    | S    | 2    | S    | >8   | R    | 2     | R    | 2    | S   | >0.5  | R    | 2    | S    |
| Cefoxitin            | <2                                   | R    | >8   | R    | 8    | R    | 8     | R    | 2    | S   | >8    | R    | >8   | R    |
| Cefotaxime           | <8                                   | R    | 8    | R    | 8    | R    | >32  | R    | >32  | R    | >32  | R    | 8    | R    | 8    | R    | 8     | R    | 2    | S   | 8     | R    | >32  | R    |
| Ceftaroline          | <0.25                                | S    | 0.5  | S    | 0.5  | S    | 1    | S    | 1    | S    | 1    | S    | 0.5  | S    | 0.5  | S    | 0.5   | S    | 8    | S   | 8     | S    | >2   | R    |
| Ampicillin           | 1                                    | R    | >1   | R    | 1    | R    | >1   | R    | >1   | R    | >1   | R    | 1    | R    | 1    | R    | 1     | R    | 1    | R   | 1     | R    | 1    | R    |
| Penicillin G         | 1                                    | R    | >1   | R    | 0.5  | R    | >1   | R    | >1   | R    | >1   | R    | >1   | R    | 0.5  | R    | 1     | R    | 0.25 | S   | 0.25  | S    | >1   | R    |
| Oxacillin            | >2                                   | R    | >2   | R    | >2   | R    | >2   | R    | >2   | R    | >2   | R    | >2   | R    | 2    | S    | 2     | R    | 0.25 | S   | 0.5   | R    | >2   | R    |
| Daptomycin           | 1                                    | S    | 1    | S    | 1    | S    | 1    | S    | 1    | S    | 1    | S    | 1    | S    | 1    | S    | 1     | S    | 1    | S   | 1     | S    | 1    | S    |
| Trimethoprim         | >4                                   | R    | 1    | S    | 1    | S    | 1    | S    | 1    | S    | 1    | S    | 1    | S    | 1    | S    | 1     | S    | 1    | S   | <10   | S    | 1    | S    |
| Teicoplanin          | 8                                    | S    | >16  | R    | 1    | S    | 1    | S    | 1    | S    | 1    | S    | 1    | S    | 1    | S    | 1     | S    | 1    | S   | <0.25 | S    | 2    | S    |
| Vancomycin           | <1                                   | S    | 1    | S    | 1    | S    | 1    | S    | 1    | S    | 1    | S    | 1    | S    | 1    | S    | 1     | S    | 1    | S   | 1     | S    | 1    | S    |
| Clindamycin          | <0.5                                 | S    | >2   | R    | 0.5  | S    | 0.5   | S    | 0.5  | S   | <0.25 | S    | >2   | R    |
| Erythromycin         | >4                                   | R    | >4   | R    | 0.25 | S    | >4   | R    | >4   | R    | 0.25 | S    | >4   | R    | 0.25 | S    | 0.25  | S    | >4   | R   | >8    | R    | >4   | R    |
| Linezolid            | 4                                    | S    | 1    | S    | 1    | S    | 1    | S    | 1    | S    | 1    | S    | 1    | S    | 1    | S    | 1     | S    | 1    | S   | 2     | S    | 1    | S    |
| Mupirocin High level | <256                                 | S    | 256   | S    | <256 | S   | <256  | S    | 256  | S    |
| Nitrofurantoin       | <16                                  | S    | 16    | S    | 16   | S   | <16   | S    | 32   | S    |
| Ciprofloxacin        | 2                                    | R    | 0.5  | S    | 0.5   | S    | 0.5  | S   | 0.5   | S    | >2   | R    |
| Levofloxacin         | <1                                   | S    | 1    | S    | 1    | S    | 1    | S    | 1    | S    | 1    | S    | 1    | S    | 1    | S    | 1     | S    | 0.5  | S   | 0.25  | S    | >4   | R    |
| Moxifloxacin         | <0.5                                 | S    | 0.5   | S    | 0.5  | S   | <0.25 | S    | >2   | R    |
| Rifampin             | <0.5                                 | S    | 0.5   | S    | 0.5  | S   | <0.5  | S    | >2   | R    |
| Tetracycline         | >8                                   | R    | >8   | R    | 0.5  | S    | 0.5  | S    | 0.5  | S    | 0.5  | S    | >8   | R    | 0.5  | S    | 0.5   | S    | 0.5  | S   | <1    | S    | 8    | R    |
| Tigecycline          | <0.25                                | S    | 0.25 | S    | 0.25 | S    | 0.25 | S    | 0.25 | S    | 0.5  | S    | 0.25 | S    | 0.5  | S    | 0.25  | S    | 0.5  | S   | <0.12 | S    | 0.25 | R    |
| % of Resistance      |                                      | 40.9 |      | 45.4 |      | 22.7 |      | 27.2 |      | 27.2 |      | 22.7 |      | 31.8 |      | 22.7 |       | 27.2 |      | 0.9 |       | 27.2 |      | 63.6 |
| Antibiotics          | S13                                  |      | S14  |      | S15  |      | S16  |      | S17  |      | S18  |      | S19  |      | S20  |      | S21   |      | S22  |     | S23   |      | S24  |      |
|                      | MIC                                  | I    | MIC  | I    | MIC  | I    | MIC  | I    | MIC  | I    | MIC  | I    | MIC  | I    | MIC  | I    | MIC   | I    | MIC  | I   | MIC   | I    | MIC  | I    |
| Gentamicin           | >0.5                                 | R    | <2   | S    | <2   | S    | <2   | S    | <2   | S    | >16  | R    | <0.5 | S    | <2   | S    | <2    | S    | <2   | S   | <2    | S    | >8   | R    |
| Cefoxitin            | >8                                   | R    | <4   | S    | <2   | S    | <2   | R    | <2   | S    | <2   | S    | <2   | S    | >8   | R    | <2    | R    | >8   | R   | >8    | R    | 8    | R    |
| Cefotaxime           | 8                                    | R    | 8    | R    | <2   | S    | 8    | R    | <2   | S    | 8    | R    | 8    | R    | <8   | R    | >8    | R    | <8   | R   | 32    | R    | <8   | R    |
| Ceftaroline          | <8                                   | R    | <8   | R    | 16   | R    | <8   | R    | <8   | R    | <8   | R    | <8   | R    | >2   | R    | >32   | R    | 2    | I   | 1     | S    | >2   | R    |
| Ampicillin           | >16                                  | R    | >16  | R    | >16  | R    | >16  | R    | >16  | R    | >16  | R    | >16  | R    | >1   | R    | >1    | R    | >1   | R   | >1    | R    | >1   | R    |
| Penicillin G         | >25                                  | R    | <1   | S    | >25  | R    | >25  | R    | 0.13 | S    | >25  | R    | >25  | R    | >1   | R    | >0.25 | R    | >1   | R   | 1     | R    | >1   | R    |

|                      |       |      |       |      |      |      |      |      |       |     |       |      |       |      |      |    |       |      |       |      |       |      |       |      |
|----------------------|-------|------|-------|------|------|------|------|------|-------|-----|-------|------|-------|------|------|----|-------|------|-------|------|-------|------|-------|------|
| Oxacillin            | 0.5   | R    | <1    | S    | 0.5  | S    | >2   | R    | <0.25 | S   | >4    | R    | >4    | R    | 0.5  | S  | >2    | R    | 0.5   | S    | >2    | R    | >2    | R    |
| Daptomycin           | 1     | S    | <1    | S    | 1    | S    | 2    | R    | <1    | S   | <1    | S    | <1    | S    | <1   | S  | >4    | R    | <1    | S    | <1    | S    | 1     | S    |
| Trimethoprim         | <10   | S    | <1    | S    | 1    | S    | <1   | S    | <1    | S   | 40    | R    | <10   | S    | <1   | S  | <1    | R    | <1    | S    | <1    | S    | 1     | S    |
| Teicoplanin          | <0.25 | S    | <1    | S    | >4   | R    | >4   | R    | <1    | S   | 8     | R    | >32   | R    | >16  | R  | 1     | S    | >16   | R    | <1    | S    | 1     | S    |
| Vancomycin           | <0.25 | S    | <1    | S    | <1   | S    | <1   | S    | 1     | S   | 1     | S    | >32   | R    | >16  | R  | <0.5  | R    | >16   | R    | <1    | S    | 0.5   | S    |
| Clindamycin          | <0.25 | S    | <0.25 | S    | 1    | S    | 1    | S    | <0.5  | S   | >8    | R    | >8    | R    | >2   | R  | <0.25 | S    | >2    | R    | <0.5  | R    | 0.25  | S    |
| Erythromycin         | >8    | R    | >8    | R    | <0.5 | S    | <0.5 | S    | <0.25 | S   | >8    | R    | >8    | R    | >4   | R  | <1    | S    | >4    | R    | >4    | R    | 1     | S    |
| Linezolid            | 2     | S    | 2     | S    | 0.5  | S    | 0.5  | S    | <1    | S   | 1     | S    | 1     | S    | >4   | R  | 2     | S    | 2     | S    | <1    | S    | 2     | S    |
| Mupirocin High level | <1    | S    | <1    | S    | <1   | S    | 8    | R    | 2     | S   | <1    | S    | <1    | S    | <256 | S  | <256  | S    | <256  | S    | <256  | S    | 256   | S    |
| Nitrofurantoin       | <16   | S    | <16   | S    | 2    | S    | 2    | S    | 2     | S   | <16   | S    | <16   | S    | <16  | S  | <16   | S    | <16   | S    | <16   | S    | 16    | S    |
| Ciprofloxacin        | <0.5  | S    | <0.5  | S    | 256  | S    | 256  | S    | 256   | S   | <0.5  | S    | <0.5  | S    | <0.5 | S  | <0.5  | S    | >2    | R    | <0.5  | S    | 0.5   | S    |
| Levofloxacin         | 0.25  | S    | <1    | S    | 16   | S    | 16   | S    | 16    | S   | >8    | R    | <0.12 | S    | <1   | S  | <1    | S    | >4    | R    | <1    | S    | 1     | S    |
| Moxifloxacin         | <0.25 | S    | <0.25 | S    | 0.5  | S    | >2   | R    | 0.5   | S   | 2     | R    | <0.25 | S    | <0.5 | S  | <0.5  | S    | 2     | R    | <0.5  | S    | 0.5   | S    |
| Rifampin             | <0.5  | S    | <0.5  | S    | 0.5  | S    | 2    | S    | 0.5   | S   | <0.5  | S    | >32   | R    | <0.5 | S  | <0.5  | S    | 1     | S    | <0.5  | S    | 0.5   | S    |
| Tetracycline         | <1    | S    | <1    | S    | 0.5  | S    | 0.5  | S    | 0.5   | S   | <1    | S    | <1    | S    | 0.5  | R  | <0.5  | S    | >8    | R    | <0.5  | S    | >8    | R    |
| Tigecycline          | <0.12 | S    | <1    | S    | 0.5  | S    | 0.5  | S    | 0.5   | S   | <0.12 | S    | <0.12 | S    | 0.5  | S  | <0.5  | S    | <0.25 | S    | <0.25 | S    | <0.25 | S    |
| % of Resistance      |       | 36.3 |       | 18.1 |      | 18.1 |      | 45.4 |       | 9.1 |       | 54.5 |       | 45.4 |      | 50 |       | 40.9 |       | 54.5 |       | 31.8 |       | 36.3 |
